# Supplementary material for: Olfactory Tubercle mediates adaptive social behavior through distinct control of threat assessment and memory updating.
Source: Research Square preprint supplement (doi:10.21203/rs.3.rs-5579784/v1), 2025-01-21
Supplement: Supplementary file 1 [file 8ef4aa5707edd334b477c6e9.pdf]

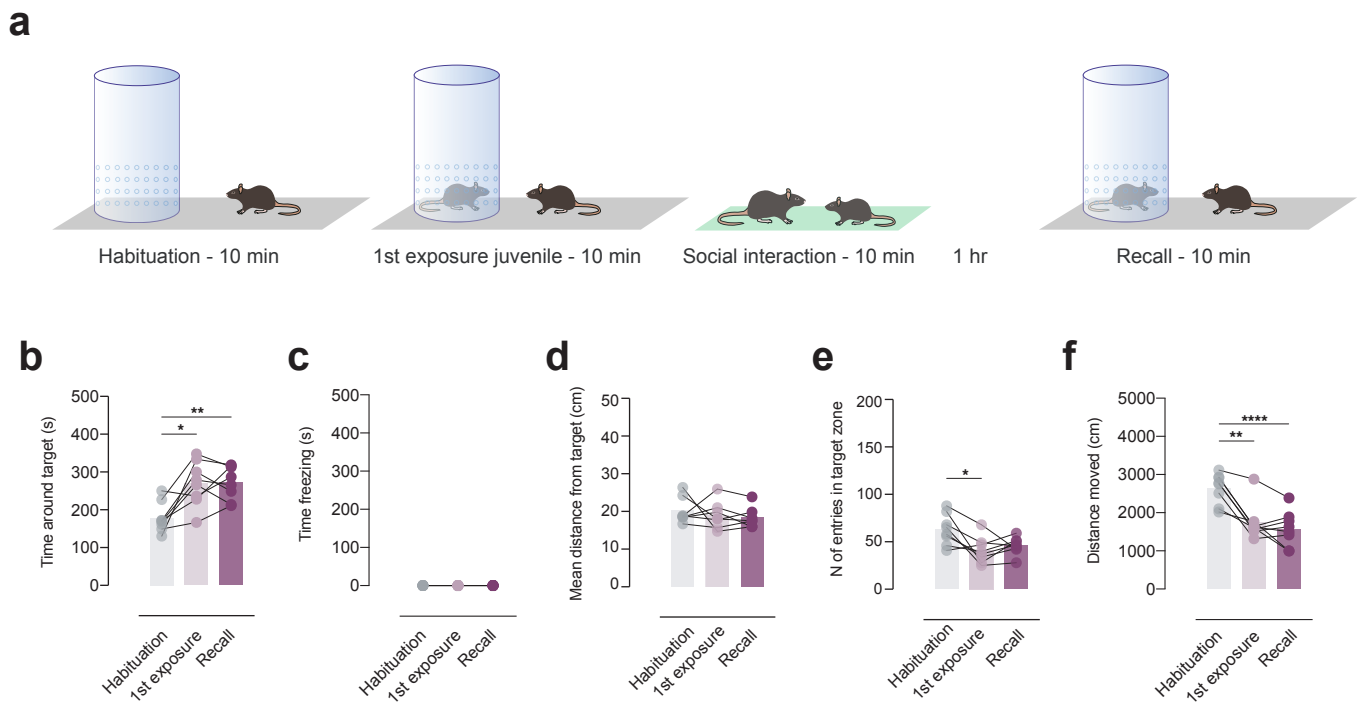

**Supplementary Figure 1. (a)** Schematic representation of experimental test. **(b)** Time around enclosure containing stimulus (RM one-way ANOVA:  $F_{1,703, 11.92} = 13.40$ ,  $p = 0.0012$ , followed by Bonferroni multiple comparison post hoc test). **(c)** Time freezing during the test. **(d)** Mean distance between nose point of the experimental mouse and the center of the target during the test (RM one-way ANOVA:  $F_{1,220, 7.321} = 0.5453$ ,  $p = 0.5177$ , followed by Bonferroni multiple comparison post hoc test). **(e)** Number of entries in target zone during the test (RM one-way ANOVA:  $F_{1,691, 11.83} = 6.290$ ,  $p = 0.0166$ , followed by Bonferroni multiple comparison post hoc test). **(f)** Distance moved in apparatus (RM one-way ANOVA:  $F_{1,234, 8.641} = 36.72$ ,  $p = 0.0001$ , followed by Bonferroni multiple comparison post hoc test).

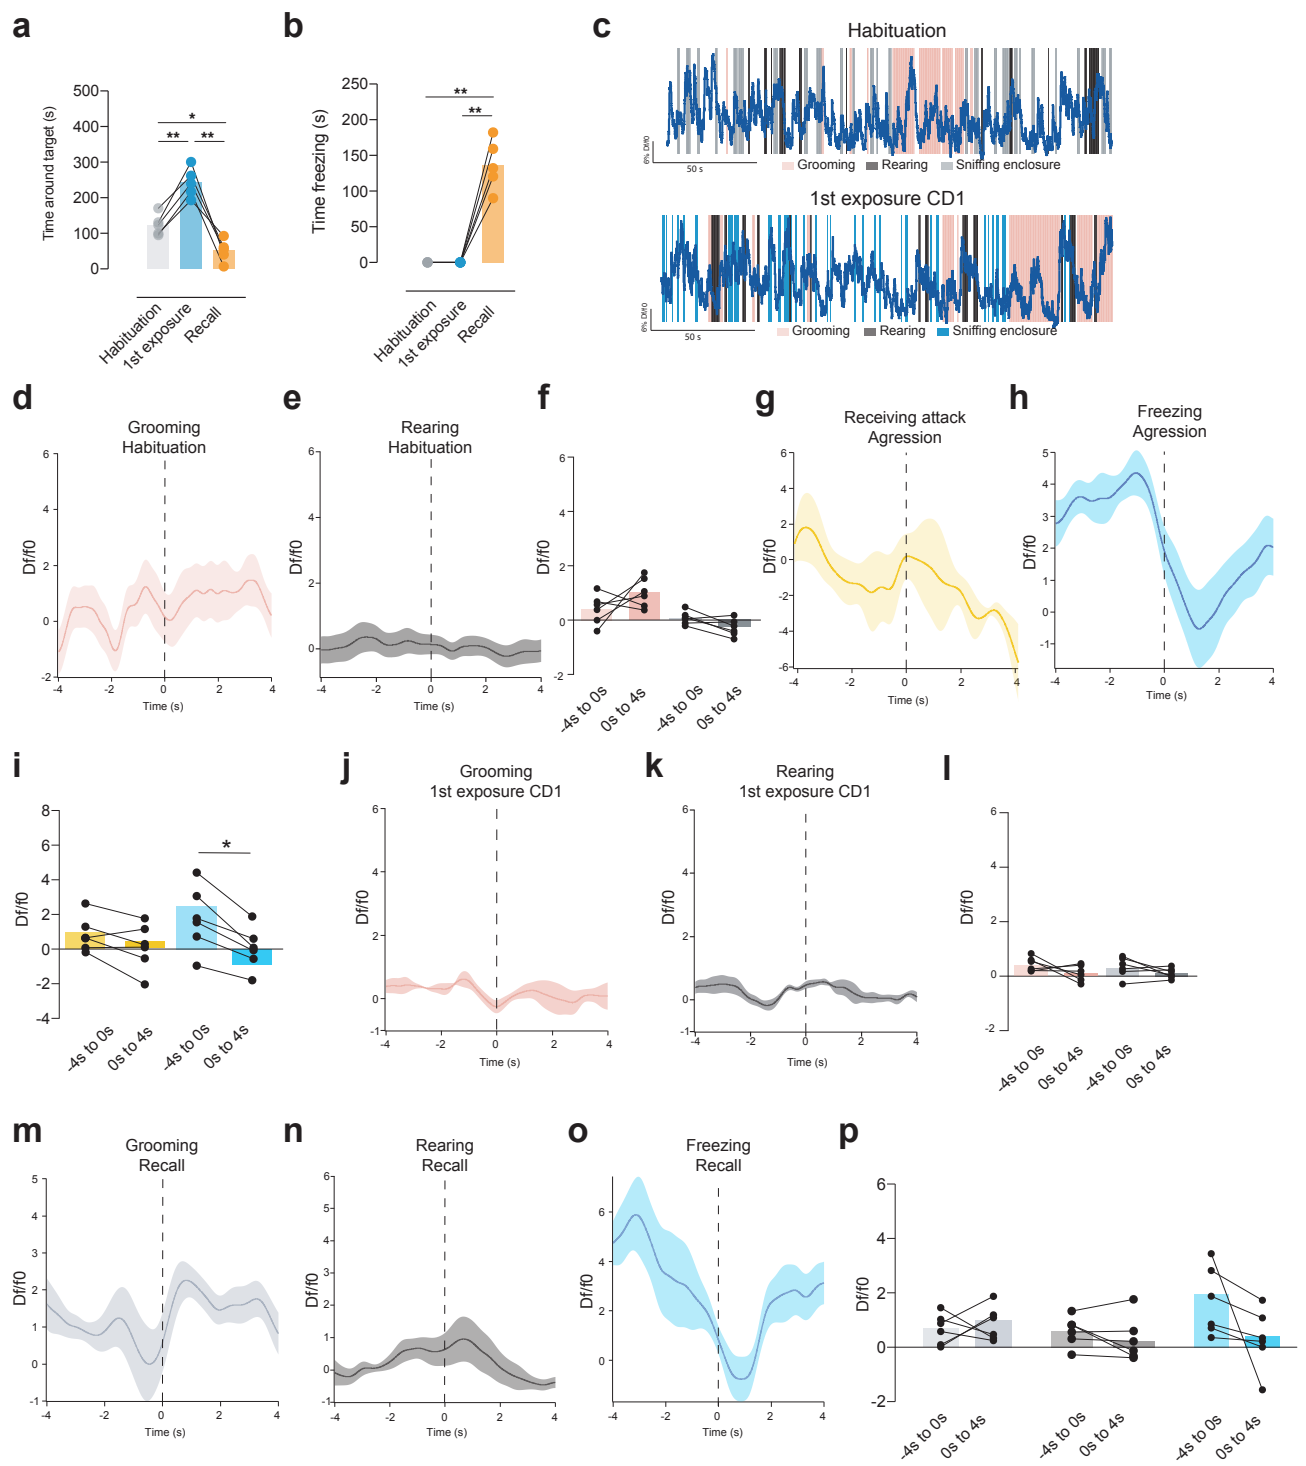

Supplementary fig. 2, Casarotto et al, 2024



**Supplementary Figure 2.** (a) Time around enclosure containing stimulus (RM one-way ANOVA:  $F_{1.391, 5.566} = 45.67$ ,  $p = 0.0005$ , followed by Bonferroni multiple comparison post hoc test). (b) Time freezing during the test (RM one-way ANOVA:  $F_{1.000, 4.000} = 74.36$ ,  $p = 0.0010$ , followed by Bonferroni multiple comparison post hoc test). (c) Example traces of photometry signals (reported as DF/F0, see Methods) during habituation. Colored boxes above the traces indicate sniffing enclosure, freezing, grooming and rearing bouts. (d) Mean DF/F0 signal  $\pm 4s$  around grooming initiation (indicated by dashed line, 0s) during habituation. (e) Mean DF/F0 signal  $\pm 4s$  around rearing initiation (indicated by dashed line, 0s) during habituation. (f) Quantification of DF/F0 difference before and after grooming (pink) and rearing (gray) start for the different phases of the test (Left: paired t-test,  $t_{1.466} = 5$ ,  $p = 0.0206$ . Right: paired t-test  $t_{2.396} = 5$ ,  $p = 0.0619$ ). (g) Mean DF/F0 signal  $\pm 4s$  around receiving attack initiation (indicated by dashed line, 0s) during the aggression phase of the test. (h) Mean DF/F0 signal  $\pm 4s$  around freezing initiation (indicated by dashed line, 0s) during the aggression phase of the test. (i) Quantification of DF/F0 difference before and after receiving attack (yellow) and freezing (blue) start for the different phases of the test (Left: paired t-test,  $t_{1.777} = 5$ ,  $p = 0.1357$ . Right: paired t-test  $t_{3.201} = 5$ ,  $p = 0.0240$ ). (j) Mean DF/F0 signal  $\pm 4s$  around grooming initiation (indicated by dashed line, 0s) during 1st exposure to CD1. (k) Mean DF/F0 signal  $\pm 4s$  around rearing initiation (indicated by dashed line, 0s) during 1st exposure to CD1. (l) Quantification of DF/F0 difference before and after grooming (pink) and rearing (gray) start for the different phases of the test (Left: paired t-test,  $t_{1.915} = 5$ ,  $p = 0.1137$ . Right: paired t-test  $t_{1.382} = 5$ ,  $p = 0.2255$ ). (m) Mean DF/F0 signal  $\pm 4s$  around grooming initiation (indicated by dashed line, 0s) during the threat recall. (n) Mean DF/F0 signal  $\pm 4s$  around rearing initiation (indicated by dashed line, 0s) during the threat recall. (o) Mean DF/F0 signal  $\pm 4s$  around freezing initiation (indicated by dashed line, 0s) during the threat recall. (p) Quantification of DF/F0 difference before and after grooming (light gray), rearing (dark gray) and freezing (blue) start for the different phases of the test (Left: paired t-test,  $t_{1.777} = 5$ ,  $p = 0.1357$ . Middle: paired t-test,  $t_{1.196} = 5$ ,  $p = 0.2855$ . Right: paired t-test  $t_{1.822} = 5$ ,  $p = 0.1281$ ).

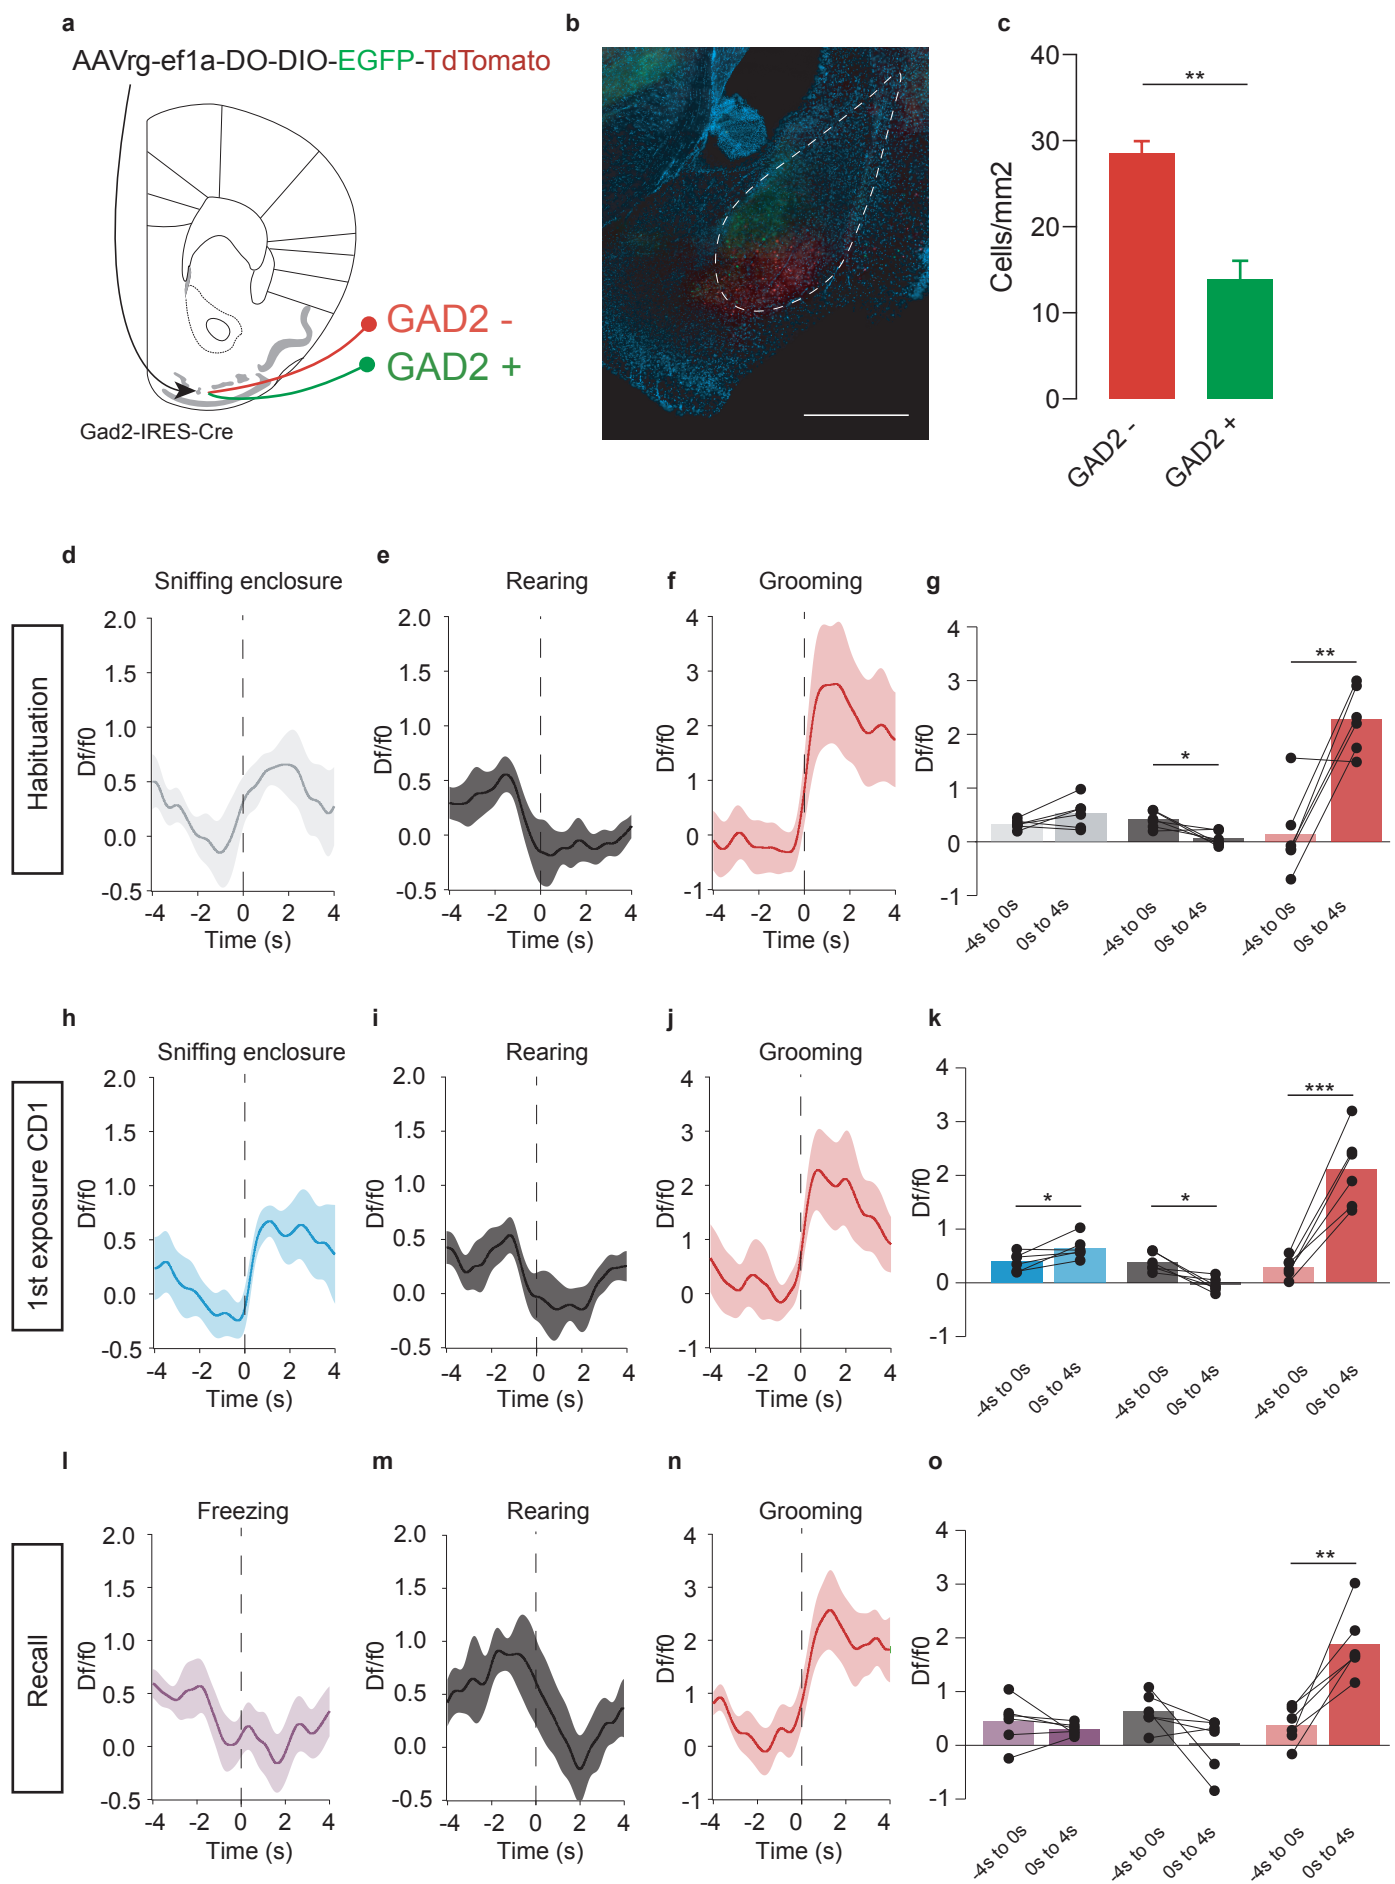

Supplementary Fig 3, Casarotto et al, 2024

**Supplementary Figure 3.** (A) Schematic of the viral injection. (B) Representative pictures of inputs from basolateral amygdala. (C) Quantification of GAD - and GAD + cells projecting to OT (unpaired t-test:  $t_{5.598} = 2$ ,  $p = 0.005$ ). (D) Mean DF/F0 signal  $\pm 4s$  around sniffing enclosure initiation (indicated by dashed line, 0s) during habituation. (E) Mean DF/F0 signal  $\pm 4s$  around rearing initiation (indicated by dashed line, 0s) during habituation. (F) Mean DF/F0 signal  $\pm 4s$  around grooming initiation (indicated by dashed line, 0s) during habituation. (G) Quantification of DF/F0 difference before and after sniffing enclosure (gray), rearing (black) and grooming (red) start for the different phases of the test (Left: paired t-test,  $t_{1.932} = 5$ ,  $p = 0.1113$ . Middle: paired t-test  $t_{3.163} = 5$ ,  $p = 0.0250$ . Right: paired t-test,  $t_{4.703} = 5$ ,  $p = 0.0053$ ). (H) Mean DF/F0 signal  $\pm 4s$  around sniffing enclosure initiation (indicated by dashed line, 0s) during 1st exposure to CD1. (I) Mean DF/F0 signal  $\pm 4s$  around rearing initiation (indicated by dashed line, 0s) during 1st exposure to CD1. (J) Mean DF/F0 signal  $\pm 4s$  around grooming initiation (indicated by dashed line, 0s) during 1st exposure to CD1. (K) Quantification of DF/F0 difference before and after sniffing enclosure (blue), rearing (black) and grooming (red) start for the different phases of the test (Left: paired t-test,  $t_{2.826} = 5$ ,  $p = 0.0369$ . Middle: paired t-test  $t_{4.002} = 5$ ,  $p = 0.0103$ . Right: paired t-test,  $t_{7.568} = 5$ ,  $p = 0.0006$ ). (L) Mean DF/F0 signal  $\pm 4s$  around freezing initiation (indicated by dashed line, 0s) during threat recall. (M) Mean DF/F0 signal  $\pm 4s$  around rearing initiation (indicated by dashed line, 0s) during threat recall. (N) Mean DF/F0 signal  $\pm 4s$  around grooming initiation (indicated by dashed line, 0s) during threat recall. (O) Quantification of DF/F0 difference before and after freezing (purple), rearing (black) and grooming (red) start for the different phases of the test (Left: paired t-test,  $t_{0.8689} = 5$ ,  $p = 0.4247$ . Middle: paired t-test  $t_{2.090} = 5$ ,  $p = 0.0909$ . Right: paired t-test,  $t_{4.967} = 5$ ,  $p = 0.0042$ ).

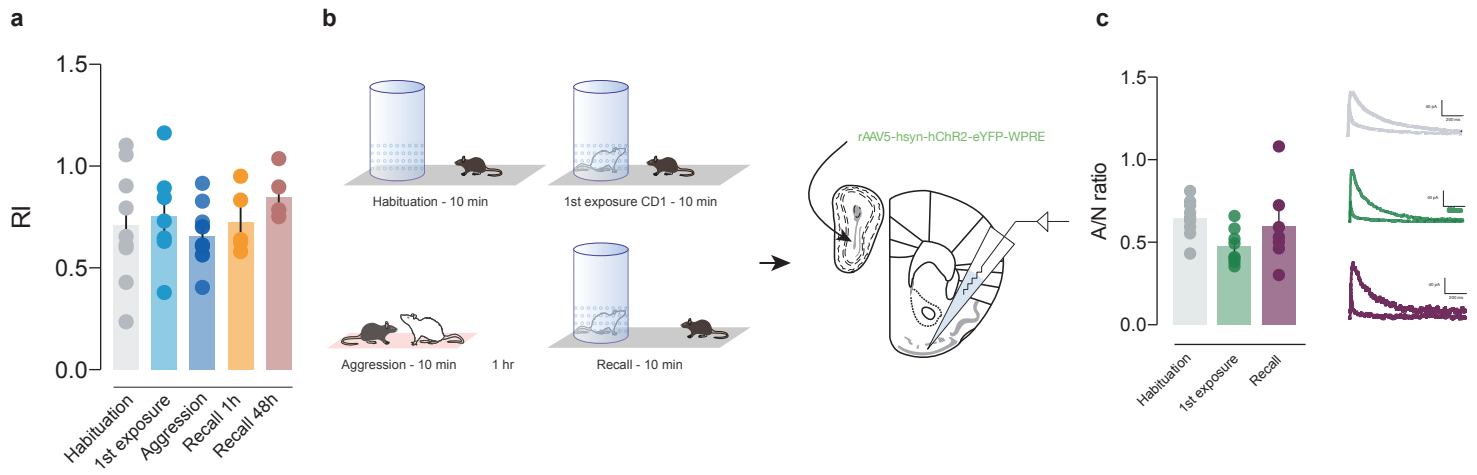

**Supplementary Figure 4.** (a) Bar graph representing rectification index (RI) recorded after different phases of the test (Ordinary one-way ANOVA:  $F(4, 31) = 0.6817$ .  $p = 0.6099$ ). (b) Schematic of the experimental timeline and viral injection. (c) Left: Bar graph representing AMPAR/NMDAR ratio recorded after different phases of the test (Ordinary one-way ANOVA:  $F(2, 21) = 2.472$ .  $p = 0.1086$ ). Right: Representative traces of AMPAR/NMDAR currents.

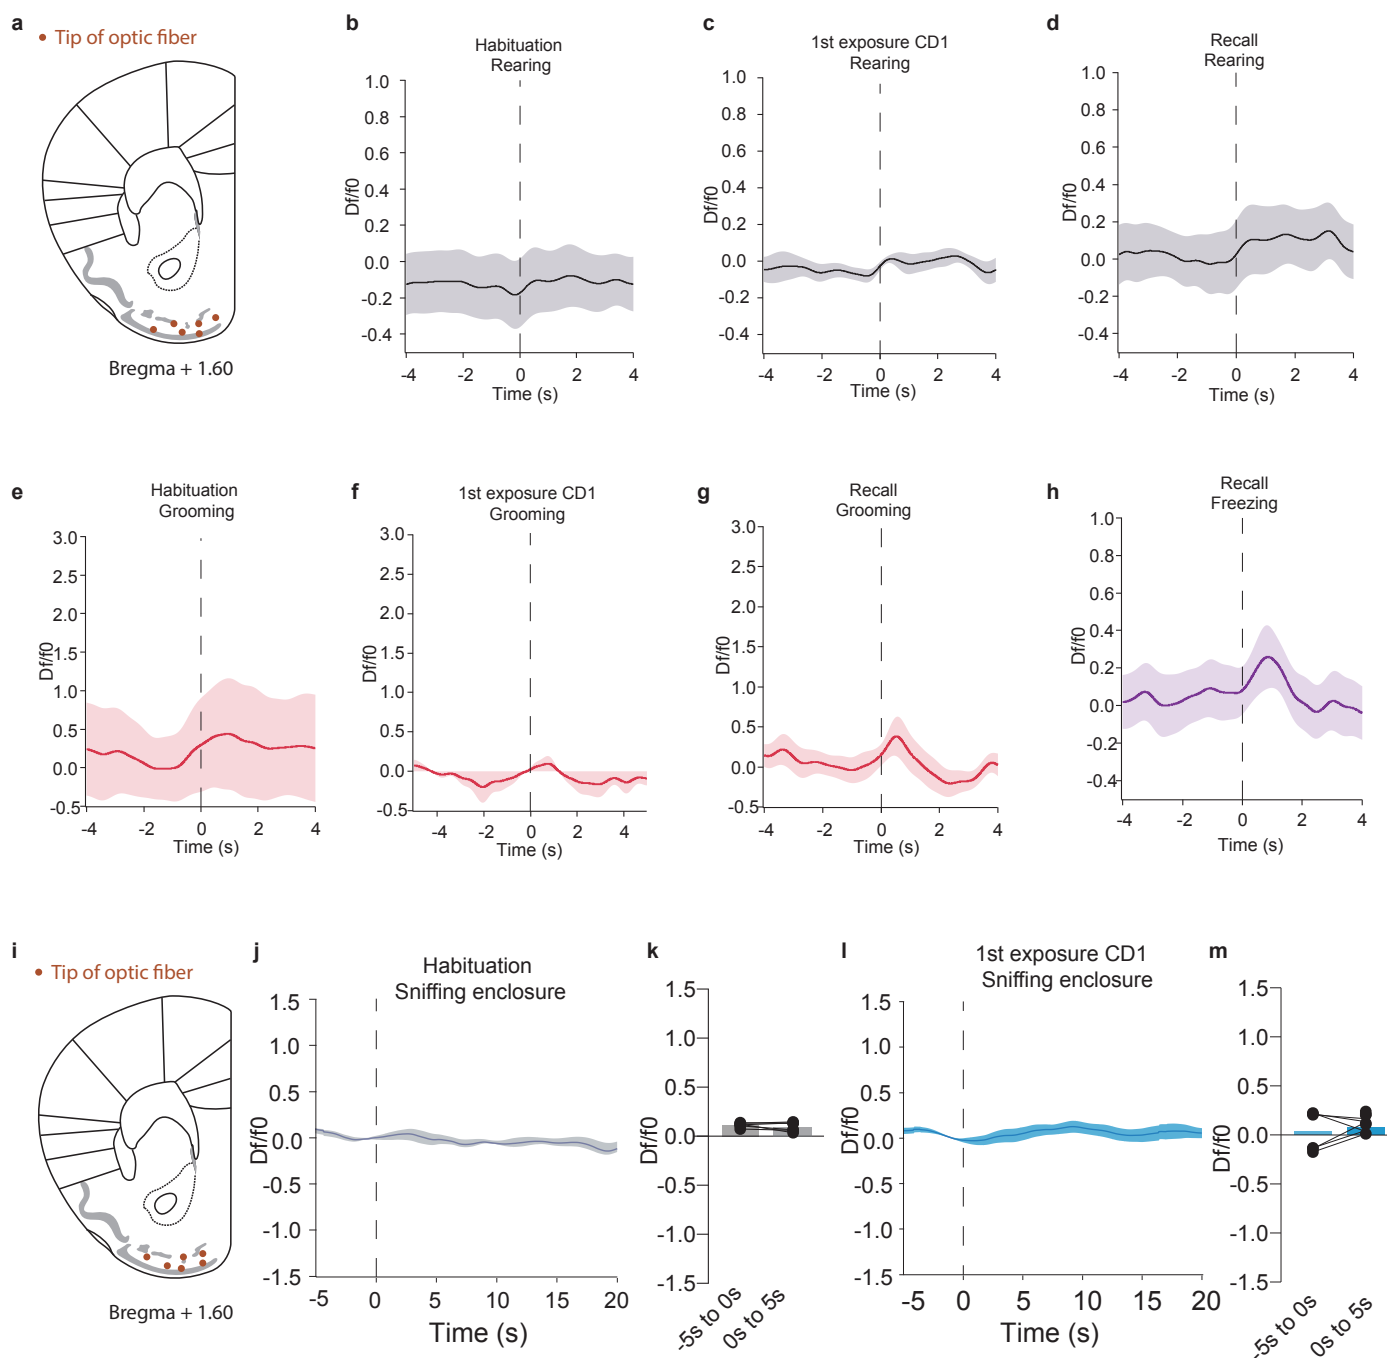

**Supplementary Figure 5.** (a) Optic fibers' tips localization after post-hoc validation. (b) Mean DF/F0 signal  $\pm 4$ s around rearing initiation (indicated by dashed line, 0s) during habituation. (c) Mean DF/F0 signal  $\pm 4$ s around rearing initiation (indicated by dashed line, 0s) during 1st exposure to CD1. (d) Mean DF/F0 signal  $\pm 4$ s around rearing initiation (indicated by dashed line, 0s) during recall. (e) Mean DF/F0 signal  $\pm 4$ s around grooming initiation (indicated by dashed line, 0s) during habituation. (f) Mean DF/F0 signal  $\pm 4$ s around grooming initiation (indicated by dashed line, 0s) during 1st exposure to CD1. (g) Mean DF/F0 signal  $\pm 4$ s around grooming initiation (indicated by dashed line, 0s) during recall. (h) Mean DF/F0 signal  $\pm 4$ s around freezing initiation (indicated by dashed line, 0s) during recall. (i) Optic fibers' tips localization after post-hoc validation. (j) Mean DF/F0 signal  $\pm 4$ s around sniffing enclosure initiation (indicated by dashed line, 0s) during habituation. (k) Quantification of DF/F0 difference before and after sniffing the enclosure start for the habituation phase (paired t-test,  $t_{1.181} = 5$ ,  $p = 0.2908$ ). (l) Mean DF/F0 signal  $\pm 4$ s around sniffing enclosure initiation (indicated by dashed line, 0s) during the 1st exposure to CD1. (m) Quantification of DF/F0 difference before and after sniffing the enclosure start for the 1st exposure to CD1 (paired t-test,  $t_{0.5973} = 5$ ,  $p = 0.5764$ ).

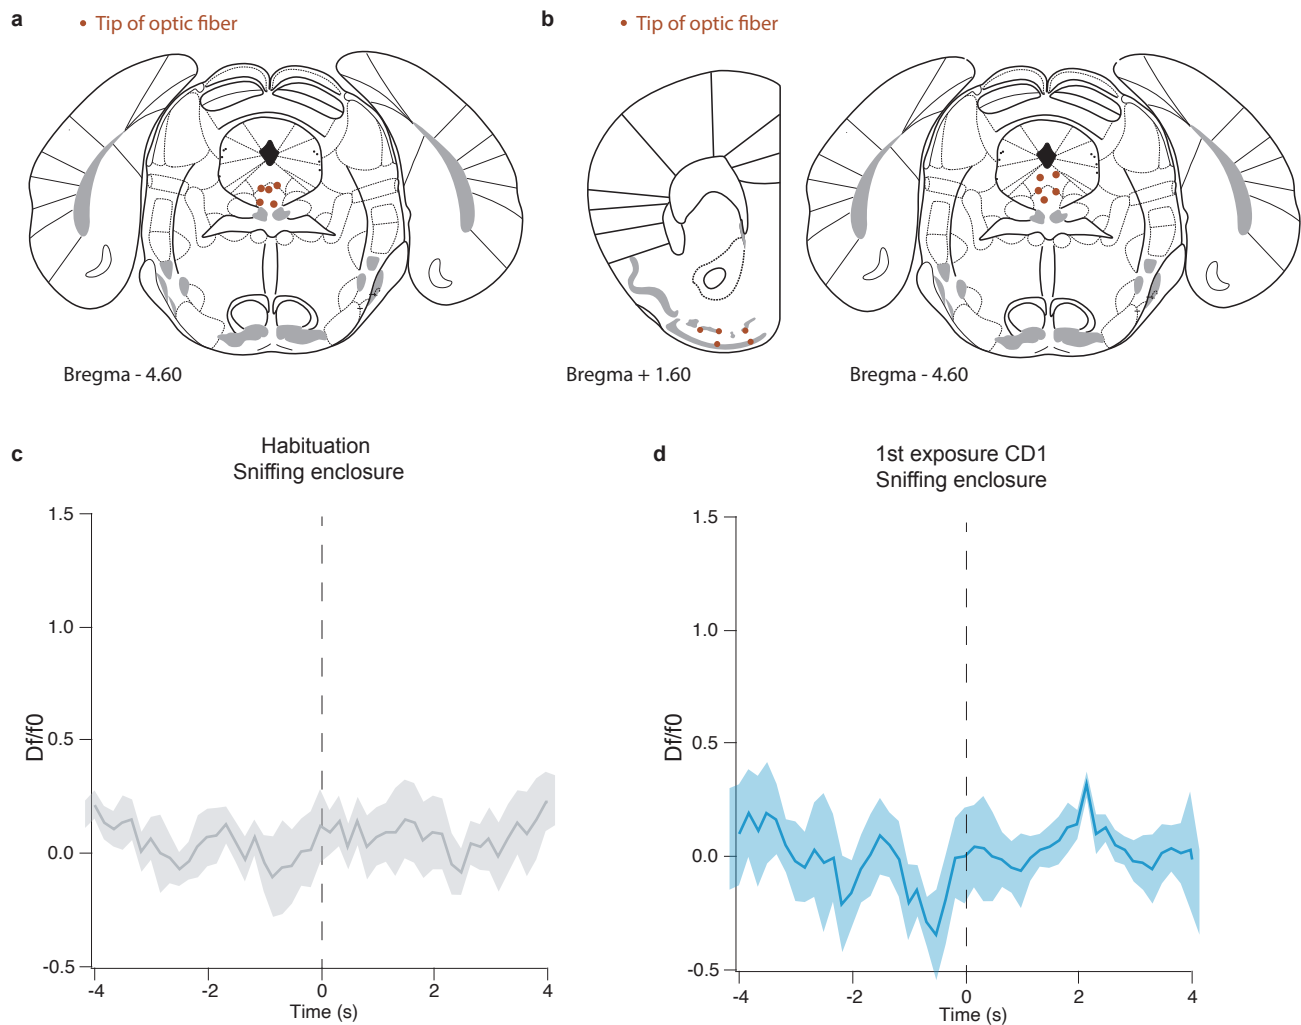

**Supplementary Figure 6.** (a) Optic fibers's tips localization after post-hoc validation. (b) Examples of optic fibers's tips localization after post-hoc validation. (c) Mean DF/F0 signal  $\pm 4s$  around sniffing enclosure initiation (indicated by dashed line, 0s) during habituation. (d) Mean DF/F0 signal  $\pm 4s$  around sniffing enclosure initiation (indicated by dashed line, 0s) during 1st exposure to CD1. 0.5764).
